# Supplementary material for: Childhood Asthma after Bacterial Colonization of the Airway in Neonates
Source: Atypon-hosted journal article supplement (doi:10.1056/nejmoa052632), 2007-10-10
Supplement: nejm_bisgaard_1487sa1.pdf [file nejm_bisgaard_1487sa1.pdf]

## Supplementary Appendix

This appendix has been provided by the authors to give readers additional information about their work.

Supplement to: Bisgaard H, Hermansen MN, Buchvald F, et al. Childhood asthma after bacterial colonization of the airway in neonates. *N Engl J Med* 2007;357:1487-95.

## METHODS

### Hypopharyngeal specimen for bacterial culture.

Aspiration from the hypopharyngeal region was performed under aseptic conditions. Cough reflex was elicited by the catheter tip approaching larynx, during which aspiration was performed. Eliciting this reflex helped define the position of the catheter tip in the same anatomical region between children. (Figure 1\_On-line) Aspiration was done intermittently assuring not to apply suction while passing through the oro- and nasopharynx. Similar procedures were attempted during sedation in the neonates 1 month of age, and in the awake child at 12 months of age. The procedures caused no adverse events.

### Symptom monitoring

Diary cards were integrated into a book on asthma in young children written for parents (see: [www.copsac.com](http://www.copsac.com)). The parents filled in days with symptoms and number of doses of inhaled  $\beta_2$ -agonist (Figure 2\_on-line).

### Asthma Diagnosis by age 5:

The criteria used for the asthma diagnosis by age 5 is listed and compared with the relevant quotations from the updated GINA guidelines (1) in Table 1\_On-line.

## RESULTS

Baseline characteristics of infants with and without culture of *S.p.*, *M.c.* and/or *H.i.* were comparable with respect to gender, gestational age, mothers smoking and antibiotic use during 3<sup>rd</sup> trimester, infant solely breastfed for a minimum of 4 weeks and the neonatal baseline lung function (FEV0.5) and bronchial responsiveness (PD(TcO<sub>2</sub>)(2) at one month. Neonates with older siblings at home were more often colonized (Table 2\_On-line)

**Table 1\_On-line:** Diagnostic criteria of asthma from age 5 in the longitudinal COPSAC birth cohort study.

Quotations from GINA guidelines for comparison.

| Asthma diagnosis                         | GINA 2005                                                                                                                                                                                                                                                                                                                     | COPSAC                                                                                                                                                                                                                                                                                |
|------------------------------------------|-------------------------------------------------------------------------------------------------------------------------------------------------------------------------------------------------------------------------------------------------------------------------------------------------------------------------------|---------------------------------------------------------------------------------------------------------------------------------------------------------------------------------------------------------------------------------------------------------------------------------------|
|                                          | Asthma diagnosed from age 5                                                                                                                                                                                                                                                                                                   | Asthma diagnosed from age 5                                                                                                                                                                                                                                                           |
| <b>SYMPTOMS</b>                          |                                                                                                                                                                                                                                                                                                                               |                                                                                                                                                                                                                                                                                       |
| Recurrent typical asthma symptoms        | <p><i>“History of any of the following:</i></p> <p><i>Cough, worse particularly at night.</i></p> <p><i>“Some patients with asthma have chronic cough... as their principal if not only symptom”</i></p> <p><i>Recurrent wheeze</i></p> <p><i>Recurrent difficulty breathing</i></p> <p><i>Recurrent chest tightness”</i></p> | <p>Documentation of five wheezy episodes of at least three consecutive days over 6 months or one episode lasting 4 weeks.</p> <p>Wheeze translated as wheeze or whistling sounds, breathlessness or persistent troublesome cough severely affecting the well being of the infant.</p> |
| Night symptoms                           | <p><i>“Symptoms occur or worsen at night, awakening the patient”</i></p>                                                                                                                                                                                                                                                      | <p>History of typical asthma symptoms such as exercise induced symptoms,</p>                                                                                                                                                                                                          |
| Precipitating and/or aggravating factors | <p><i>“Symptoms occur or worsen in the presence of: Animals with fur, exercise.....”</i></p>                                                                                                                                                                                                                                  | <p>prolonged nocturnal cough,</p> <p>cough outside common cold,</p> <p>symptoms causing awakening</p>                                                                                                                                                                                 |
| Exclusion of alternative diagnoses       | <p><i>“Alternative but very rare causes of recurrent wheezing, include cystic fibrosis...Chest radiography is an important diagnostic test to exclude</i></p>                                                                                                                                                                 | <p>Chest X-ray</p> <p>Sweat chloride test</p>                                                                                                                                                                                                                                         |

|                                                 |                                                                                                                                                                                            |                                                                                                              |
|-------------------------------------------------|--------------------------------------------------------------------------------------------------------------------------------------------------------------------------------------------|--------------------------------------------------------------------------------------------------------------|
|                                                 | <i>such alternative causes of wheezing”</i>                                                                                                                                                |                                                                                                              |
| <b>RISK FACTORS</b>                             |                                                                                                                                                                                            |                                                                                                              |
| Risk factors                                    | <i>“Eczema, hay fever or family history of asthma or atopic diseases are often associated with asthma.”</i>                                                                                | Mothers with doctor verified asthma and a current or previous history of regularly anti-asthmatic treatment. |
| <b>DOCUMENTATION</b>                            |                                                                                                                                                                                            |                                                                                                              |
| Diary cards                                     | <i>“important tool”</i>                                                                                                                                                                    | Day-by-day recording                                                                                         |
| Wheezing at examination                         | <i>“A normal chest examination does not exclude asthma.”</i>                                                                                                                               | Recorded but not required for diagnosis                                                                      |
| Reversibility/variability in airflow limitation | <i>“Asthma can often be diagnosed on the basis of symptoms. However, measurements of lung function abnormalities greatly enhance diagnostic confidence in children 5 years and older.”</i> | FEV <sub>1</sub> + sRaw<br>Baseline + reversibility<br>Performed but not required for diagnosis              |
| <b>MEDICATION</b>                               |                                                                                                                                                                                            |                                                                                                              |
| Trial of ICS                                    | <i>“A trial of asthma medication is probably the most confident way to make a diagnosis of asthma in children.”</i>                                                                        | Improvement on ICS<br>+<br>Relapse after stopping ICS                                                        |
| Trial of $\beta_2$ -agonist                     | <i>“Symptoms respond to anti-asthma therapy”</i>                                                                                                                                           | In need of intermittent $\beta_2$ -agonist                                                                   |

Table 2\_On-line. Perinatal and neonatal characteristics of neonates with and without colonization with *S. pneumoniae*, *H. influenzae* and/or *M. catarrhalis* in the airways at one month of age. Frequencies are calculated for the 279 neonates with non-missing characteristics and non-missing information on colonization. P-values correspond to Fishers exact test for independence. Baseline lung function and bronchial responsiveness was measured by the Raised Volume Rapid Thoracic Compression technique at one month.(2)

|                                                           |             | Colonized |     | P-value |
|-----------------------------------------------------------|-------------|-----------|-----|---------|
|                                                           |             | Yes       | No  |         |
| Male                                                      |             | 53%       | 49% | 0.66    |
| Mother smoked during 3 <sup>rd</sup> trimester            |             | 18%       | 14% | 0.53    |
| Mother used oral antibiotics in 3 <sup>rd</sup> trimester |             | 18%       | 11% | 0.26    |
| Infant fully breastfed >1 month                           |             | 98%       | 94% | 0.32    |
| Gestational age                                           | < 38 weeks  | 16%       | 19% | 0.14    |
|                                                           | 38-41 weeks | 77%       | 64% |         |
|                                                           | > 41 weeks  | 7%        | 16% |         |
| Older children at home                                    | 0           | 30%       | 72% | <0.0001 |
|                                                           | 1           | 54%       | 22% |         |
|                                                           | 2+          | 16%       | 7%  |         |

|                                        |                  |     |     |      |
|----------------------------------------|------------------|-----|-----|------|
| Baseline FEV <sub>0.5</sub> at 1 month | ≤25% quintile    | 35% | 23% | 0.09 |
|                                        | 25%-50% quintile | 25% | 25% |      |
|                                        | 50%-75% quintile | 14% | 28% |      |
|                                        | ≥75% quintile    | 26% | 24% |      |
| Bronchial responsiveness at 1 month    | ≤25% quintile    | 32% | 23% | 0.54 |
|                                        | 25%-50% quintile | 23% | 26% |      |
|                                        | 50%-75% quintile | 26% | 25% |      |
|                                        | ≥75% quintile    | 19% | 26% |      |

Figure 1\_On-line: Hypopharyngeal specimen for bacterial culture.

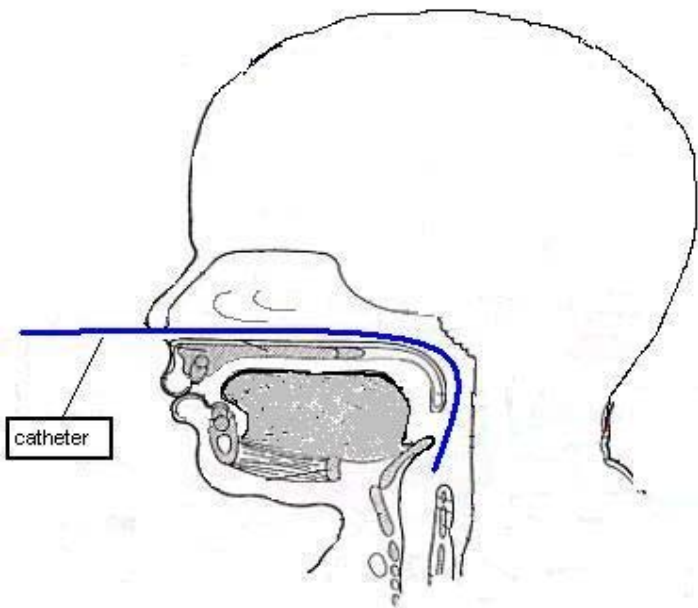

Figure 2\_on-line. Diary cards from book “Asthma in Young Children” ([http://ipaper.dk/copsac/Asthma\\_in\\_young/](http://ipaper.dk/copsac/Asthma_in_young/)) given to parents to fill in dichotomized score for troublesome lung symptoms affecting the child wellbeing and use of inhaled  $\beta_2$ -agonist.

Date

Month

Year

Lung symptoms  
yes/no

Reliever  
medication

|                                 |     | Januar 2007 |    |    |    |    |    |    |    |    |    |    |    |    |    |    |    |    |    |    |    |    |    |    |    |    |    |    |    |    |    |    |  |  |
|---------------------------------|-----|-------------|----|----|----|----|----|----|----|----|----|----|----|----|----|----|----|----|----|----|----|----|----|----|----|----|----|----|----|----|----|----|--|--|
| Dato                            |     | 1           | 2  | 3  | 4  | 5  | 6  | 7  | 8  | 9  | 10 | 11 | 12 | 13 | 14 | 15 | 16 | 17 | 18 | 19 | 20 | 21 | 22 | 23 | 24 | 25 | 26 | 27 | 28 | 29 | 30 | 31 |  |  |
|                                 |     | ma          | ti | on | to | fr | lø | sø | ma | ti | on | to | fr | lø | sø | ma | ti | on | to | fr | lø | sø | ma | ti | on | to | fr | lø | sø | ma | ti | on |  |  |
| Lunge<br>Symptomer              | Ja  |             |    |    |    |    |    |    |    |    |    |    |    |    |    |    |    |    |    |    |    |    |    |    |    |    |    |    |    |    |    |    |  |  |
|                                 | Nej |             |    |    |    |    |    |    |    |    |    |    |    |    |    |    |    |    |    |    |    |    |    |    |    |    |    |    |    |    |    |    |  |  |
| Antal<br>Bricanyl<br>behandling |     |             |    |    |    |    |    |    |    |    |    |    |    |    |    |    |    |    |    |    |    |    |    |    |    |    |    |    |    |    |    |    |  |  |

## Reference List

- (1) Global Strategy for Asthma Management and Prevention. No 02-3659. 2005. NIH publication.
- (2) Loland L, Buchvald FF, Brydensholt HL, Anhoj J, Hall GL, Persson T et al. Sensitivity of Bronchial Responsiveness Measurements in Young Infants. *Chest* 2006; 129(3):669-675.
